# Supplementary material for: Use of Prescribed Drugs to Treat Chronic Diseases during Pregnancy in Outpatient Care in Switzerland between 2014 and 2018: Descriptive Analysis of Swiss Health Care Claims Data
Source: MDPI journal article supplement (doi:10.3390/ijerph19031456), 2022-01-27
Supplement: s1 [file s1]

**Table S1.** Description of the study population (weighted numbers).

| <b>Year</b> | <b>N of deliveries<br/>in the cohort</b> | <b>Mean of maternal age at<br/>delivery in the cohort<br/>(sd)</b> | <b>Mean maternal<br/>age at delivery<br/>in Switzerland<br/>(BfS)</b> | <b>Percentage of cesarean<br/>section in the cohort</b> | <b>Percentage of<br/>cesarean section in<br/>Switzerland (BfS)</b> |
|-------------|------------------------------------------|--------------------------------------------------------------------|-----------------------------------------------------------------------|---------------------------------------------------------|--------------------------------------------------------------------|
| <b>2014</b> | 9'560                                    | 32.09 (5.06)                                                       | 31.7                                                                  | 34.6                                                    | 33.7                                                               |
| <b>2015</b> | 9'409                                    | 32.10 (5.20)                                                       | 31.8                                                                  | 34.8                                                    | 33.3                                                               |
| <b>2016</b> | 9'163                                    | 32.03 (5.25)                                                       | 31.8                                                                  | 34.1                                                    | 33.2                                                               |
| <b>2017</b> | 8'811                                    | 32.12 (5.33)                                                       | 31.9                                                                  | 33.8                                                    | 32.3                                                               |
| <b>2018</b> | 8'300                                    | 32.09 (5.23)                                                       | 32.0                                                                  | 33.4                                                    | 32.1                                                               |

**Table S2.** Exposure prevalence to different drug groups and active substances during pregnancy overall and within trimester of pregnancy and pre-pregnancy separately (weighted numbers).

| ATC code                                                       | Drug substance                 | Pre pregnancy<br>N (/10'000) | T1<br>N (/10'000)      | T2<br>N (/10'000)    | T3<br>N (/10'000)      | T1-T3<br>N (/10'000)   |
|----------------------------------------------------------------|--------------------------------|------------------------------|------------------------|----------------------|------------------------|------------------------|
| <b>At least one drug from any of the following drug groups</b> |                                | <b>5'267 (1'164.0)</b>       | <b>4'837 (1'068.9)</b> | <b>5'052 (1'116)</b> | <b>7'020 (1'551.3)</b> | <b>9'939 (2'196.4)</b> |
| <b>H03</b>                                                     | <b>Thyroid therapy</b>         | <b>1'287 (284.4)</b>         | <b>2'115 (467.4)</b>   | <b>2'316 (511.8)</b> | <b>2'139 (472.7)</b>   | <b>3'021 (667.6)</b>   |
| H03A                                                           | Thyroid preparations           | 1'244 (274.9)                | 2'071 (457.7)          | 2'283 (504.5)        | 2'113 (467.0)          | 2'967 (655.7)          |
| H03AA01                                                        | Levothyroxine sodium           | 1'227 (271.2)                | 2'057 (454.6)          | 2'268 (501.2)        | 2'100 (464.1)          | 2'945 (650.8)          |
| H03AA02                                                        | Liothyronine sodium            | 21 (4.6)                     | 15 (3.3)               | 15 (3.3)             | 15 (3.3)               | 25 (5.5)               |
| H03B                                                           | Antithyroid preparations       | 48 (10.6)                    | 46 (10.2)              | 34 (7.5)             | 26 (5.7)               | 58 (12.8)              |
| H03BA02                                                        | Propylthiouracil               | 22 (4.9)                     | 33 (7.3)               | 16 (3.5)             | 11 (2.4)               | 38 (8.4)               |
| H03BB01                                                        | Carbimazole                    | 30 (6.6)                     | 22 (4.9)               | 20 (4.4)             | 16 (3.5)               | 37 (8.2)               |
| <b>C02, C03, C07, C08, C09</b>                                 | <b>Anti-hypertensive drugs</b> | <b>340 (75.1)</b>            | <b>301 (66.5)</b>      | <b>583 (128.8)</b>   | <b>2'077 (459.0)</b>   | <b>2'431 (537.2)</b>   |
| C08                                                            | Calcium channel blockers       | 32 (7.1)                     | 51 (11.3)              | 348 (76.9)           | 1'733 (383.0)          | 1879 (415.2)           |
| C08CA05                                                        | Nifedipine                     | 18 (4.0)                     | 36 (8.0)               | 338 (74.7)           | 1'714 (378.8)          | 1'850 (408.8)          |
| C08CA01                                                        | Amlodipine                     | 10 (2.2)                     | 13 (2.9)               | *                    | 16 (3.5)               | 25 (5.5)               |
| C07                                                            | Beta blocking agents           | 197 (43.5)                   | 209 (46.2)             | 215 (47.5)           | 317 (70.1)             | 474 (104.7)            |
| C07AG01                                                        | Labetalol                      | 28 (6.2)                     | 70 (15.5)              | 100 (22.1)           | 210 (46.4)             | 259 (57.2)             |
| C07AB02                                                        | Metoprolol                     | 67 (14.8)                    | 79 (17.5)              | 70 (15.5)            | 68 (15)                | 127 (28.1)             |
| C09                                                            | RAA acting agents              | 70 (15.5)                    | 27 (6.0)               | 12 (2.7)             | *                      | 42 (9.3)               |
| C09CA06                                                        | Candesartan                    | *                            | *                      | *                    | *                      | *                      |
| C09AA03                                                        | Lisinopril                     | 11 (2.4)                     | *                      | *                    | *                      | *                      |

|                                                       |                                                                           |               |               |             |             |               |
|-------------------------------------------------------|---------------------------------------------------------------------------|---------------|---------------|-------------|-------------|---------------|
| C03                                                   | Diuretics                                                                 | 35 (7.7)      | 13 (2.9)      | * (1.5)     | 16 (3.5)    | 34 (7.5)      |
| C03CA01                                               | <i>Furosemide</i>                                                         | 10 (2.2)      | *             | *           | 11 (2.4)    | 17 (3.8)      |
| C03CA04                                               | <i>Toraseamide</i>                                                        | 10 (2.2)      | *             | *           | *           | 14 (3.1)      |
| C02                                                   | Antihypertensives                                                         | *             | *             | *           | *           | *             |
| C02AB01                                               | <i>Methyldopa</i>                                                         | *             | *             | *           | *           | *             |
| C02CA04                                               | <i>Doxazosin</i>                                                          | *             | *             | *           | *           | *             |
| N06A,<br>N05A,<br>N05AN,<br>N05BA,<br>N05CD,<br>N05CF | Psychotropic drugs                                                        | 1'912 (422.5) | 1'117 (246.8) | 790 (174.6) | 771 (170.4) | 1'716 (379.2) |
| N06A                                                  | Antidepressants                                                           | 1'151 (254.4) | 793 (175.2)   | 563 (124.4) | 497 (109.8) | 1'127 (249.1) |
| N06AB                                                 | Selective serotonin reuptake inhibitors                                   | 689 (1.5)     | 505 (1.1)     | 398 (88)    | 355 (78.5)  | 726 (1.6)     |
| N06AB10                                               | <i>Escitalopram</i>                                                       | 286 (63.2)    | 173(38.2)     | 126(27.8)   | 117(25.9)   | 255 (56.4)    |
| N06AB06                                               | <i>Sertraline</i>                                                         | 163 (36.0)    | 130 (28.7)    | 136 (30.1)  | 134 (29.6)  | 219 (48.4)    |
| N06AX                                                 | Other antidepressants                                                     | 474 (104.7)   | 294 (65.0)    | 169 (37.4)  | 141 (31.2)  | 423 (93.5)    |
| N06AX25                                               | <i>Hyperici herba</i>                                                     | 112 (24.8)    | 74 (16.4)     | 63(13.9)    | 60 (13.3)   | 160 (35.4)    |
| N06AX16,<br>N06AX21                                   | Serotonin and noradrenaline reuptake inhibitors (duloxetine, venlafaxine) | 151 (33.4)    | 110 (24.3)    | 58 (12.8)   | 43 (9.5)    | 124 (27.4)    |
| N06AX11,<br>N06AX03                                   | Alpha antagonists (mirtazapine, mianserine)                               | 71 (15.7)     | 46 (10.2)     | 24 (5.3)    | 17 (3.8)    | 65 (14.4)     |
| N06AA                                                 | Non selective monoamine reuptake inhibitors                               | 70 (15.5)     | 45 (9.9)      | 17 (3.8)    | 17 (3.8)    | 60 (13.3)     |

|                                    |                                                       |                    |                   |                    |                      |                      |
|------------------------------------|-------------------------------------------------------|--------------------|-------------------|--------------------|----------------------|----------------------|
| N06AA06                            | Trimipramine                                          | 39 (8.6)           | 23 (5.1)          | *                  | *                    | 28 (6.2)             |
| N06AA09                            | Amitriptyline                                         | 19 (4.2)           | 14 (3.1)          | 11 (2.4)           | 12 (2.7)             | 23 (5.1)             |
| <b>N05A</b>                        | <b>Antipsychotics</b>                                 | <b>227 (50.2)</b>  | <b>130 (28.7)</b> | <b>85 (18.8)</b>   | <b>92 (20.3)</b>     | <b>171 (37.8)</b>    |
| N05AH04                            | Quetiapine                                            | 93 (20.6)          | 63 (13.9)         | 54 (11.9)          | 56 (12.4)            | 82 (18.1)            |
| N05AX12                            | Aripiprazole                                          | 30 (6.6)           | 20 (4.4)          | 13 (2.9)           | 15 (3.3)             | 29 (6.4)             |
| N05AH03                            | Olanzapine                                            | 22 (4.9)           | 14 (3.1)          | *                  | 11 (2.4)             | 21 (4.6)             |
| N05AX08                            | Risperidone                                           | 14 (3.1)           | *                 | *                  | *                    | 11 (2.4)             |
| N05AD01                            | Haloperidol                                           | *                  | *                 | *                  | *                    | 10 (2.2)             |
| N05AD08                            | Droperidol                                            | 46 (10.2)          | *                 | *                  | *                    | *                    |
| N05AF03                            | Chlorprothixene                                       | 10 (2.2)           | *                 | *                  | *                    | *                    |
| N05AN01                            | Lithium                                               | *                  | *                 | *                  | *                    | *                    |
| <b>N05BA,<br/>N05CD,<br/>N05CF</b> | <b>Benzodiazepine derivatives /<br/>related drugs</b> | <b>898 (198.4)</b> | <b>410 (90.6)</b> | <b>234 (51.7)</b>  | <b>259 (57.2)</b>    | <b>733 (162.0)</b>   |
| N05BA,<br>N05CD                    | Benzodiazepine derivatives                            | 765 (169.1)        | 317 (70.1)        | 204 (45.1)         | 211 (46.6/10'00)     | 602 (133)            |
| N05BA06                            | Lorazepam                                             | 331 (73.1)         | 158 (34.9)        | 102 (22.5)         | 122(27.0)            | 329 (72.7)           |
| N05CD08                            | Midazolam                                             | 238 (52.6)         | 45 (9.9)          | 11 (2.4)           | 14 (3.1)             | 65 (14.4)            |
| N05CF                              | Benzodiazepine related drugs                          | 188 (41.5)         | 116 (25.6)        | 40 (8.8)           | 61(13.5)             | 177 (39.1)           |
| N05CF02                            | Zolpidem                                              | 169 (37.3)         | 108 (23.9)        | 39 (8.6)           | 60 (13.3)            | 167 (36.9)           |
| N05CF01                            | Zopiclone                                             | 21 (4.6)           | *                 | *                  | *                    | 11 (2.4)             |
| <b>A10</b>                         | <b>Anti-diabetics</b>                                 | <b>440 (97.2)</b>  | <b>389 (86.2)</b> | <b>551 (121.8)</b> | <b>1'565 (345.8)</b> | <b>1'786 (394.7)</b> |
| A10A                               | Insulins and analogues                                | 124 (27.4)         | 189 (41.8)        | 495 (1.1)          | 1'522 (336.3)        | 1'582 (349.6)        |
| A10AE                              | Long acting                                           | 56 (12.4)          | 100 (22.1)        | 310 (68.5)         | 939 (207.5)          | 1'011 (223.4)        |
| A10AB                              | Fast acting                                           | 110 (24.3)         | 153 (33.8)        | 252 (55.7)         | 714 (157.8)          | 749 (165.5)          |
| A10AC                              | Intermediate acting                                   | *                  | 24 (5.3)          | 115 (25.4)         | 435 (96.1)           | 469 (1.0)            |
|                                    |                                                       | 330 (72.9)         | 221 (48.8)        | 70 (15.5)          | 65 (14.4)            | 273 (60.3)           |
| A10B                               | Blood glucose lowering drugs                          |                    |                   |                    |                      |                      |

|                |                                                                               |             |               |                |               |               |
|----------------|-------------------------------------------------------------------------------|-------------|---------------|----------------|---------------|---------------|
| <i>A10BA02</i> | <i>Metformin</i>                                                              | 308 (68.1)  | 212 (46.8)    | 66 (14.6)      | 58 (12.8)     | 255 (56.4)    |
| <i>A10BJ02</i> | <i>Liraglutide</i>                                                            | *           | *             | *              | *             | *             |
| <i>A10BB01</i> | <i>Glibenclamide</i>                                                          | *           | *             | *              | *             | *             |
| <b>R03</b>     | <b>Obstructive airway diseases</b>                                            | 893 (197.3) | 694 (153.4)   | 773 (170.8)    | 739 (163.3)   | 1'637 (361.8) |
| R03AK          | Adrenergics with<br>glucocorticoids or other drugs<br>(excl anticholinergics) | 624 (137.9) | 426 (94.1)    | 479<br>(105.9) | 425<br>(93.9) | 968 (213.9)   |
| <i>R03AK07</i> | <i>Formoterol and budesonide</i>                                              | 421 (93.0)  | 273 (60.3)    | 330 (72.9)     | 277 (61.2)    | 673 (148.7)   |
| <i>R03AK06</i> | <i>Salmeterol and fluticasone</i>                                             | 175 (38.7)  | 132 (29.2)    | 139 (30.7)     | 131 (28.9)    | 275 (60.8)    |
| R03AC          | Selective B2 adrenoreceptor<br>agonists                                       | 317 (70.1)  | 296<br>(65.4) | 327 (72.3)     | 279 (61.7)    | 717 (158.4)   |
| <i>R03AC02</i> | <i>Salbutamol</i>                                                             | 272 (60.1)  | 252 (55.7)    | 283 (62.5)     | 249 (55.0)    | 637 (140.8)   |
| <i>R03AC13</i> | <i>Formoterol</i>                                                             | 25 (5.5)    | 30 (6.6)      | 19 (4.2)       | 16 (3.5)      | 43 (9.5)      |
| R03BA          | Inhaled Glucocorticoids                                                       | 78 (17.2)   | 95 (21.0)     | 118 (26.1)     | 98 (21.7)     | 255 (56.4)    |
| <i>R03BA02</i> | <i>Budesonide</i>                                                             | 30 (6.6)    | 50 (11.0)     | 65 (14.4)      | 52 (11.5)     | 149 (32.9)    |
| <i>R03BA05</i> | <i>Fluticasone</i>                                                            | 27 (6.0)    | 24 (5.3)      | 34 (7.5)       | 27 (6.0)      | 65 (14.4)     |
| R03CC          | Selective beta-2<br>adrenoreceptor agonists                                   | *           | *             | *              | 59 (13.0)     | 61 (13.5)     |
| <i>R03CC05</i> | <i>Hexoprenaline</i>                                                          | *           | *             | *              | 56 (12.4)     | 56 (12.4)     |
| <i>R03CC02</i> | <i>Salbutamol</i>                                                             | *           | *             | *              | *             | *             |
| R03BB          | Anticholinergics                                                              | 21 (4.6)    | 19 (4.2)      | 16 (3.5)       | 18 (4.0)      | 45 (9.9)      |
| <i>R03BB01</i> | <i>Ipratropium bromide</i>                                                    | 16 (3.5)    | 16 (3.5)      | 13 (2.9)       | 16 (3.5)      | 40 (8.8)      |
| <i>R03BB04</i> | <i>Tiotropium bromide</i>                                                     | *           | *             | *              | *             | *             |
| R03AL          | Adrenergics in combination<br>with anticholinergics                           | 17 (3.8)    | 12 (2.7)      | 13 (2.9)       | 20 (4.4)      | 40 (8.8)      |

|                                                                 |                                                      |               |             |            |             |               |
|-----------------------------------------------------------------|------------------------------------------------------|---------------|-------------|------------|-------------|---------------|
| R03AL02                                                         | Salbutamol and ipratropium bromide                   | 114 (25.2)    | 89 (19.7)   | 74 (16.4)  | 124 (27.4)  | 259 (57.2)    |
| R03DC<br>(R03DC03)                                              | Leukotriene receptor antagonists (Montelukast)       | 42 (9.3)      | 27 (6.0)    | 12 (2.7)   | 6 (1.3)     | 34 (7.5)      |
| R03DX                                                           | Other systemic drugs for obstructive airway diseases | 11 (2.4)      | *           | *          | *           | *             |
| R03DX05                                                         | Omalizumab                                           | *             | *           | *          | *           | *             |
| R03DX09                                                         | Mepolizumab                                          | *             | *           | *          | *           | *             |
| H02AB,<br>A07EC,<br>P01BA02,<br>L03, L04AD,<br>AX, AA,<br>J06BA | Drugs to treat auto-immune diseases                  | 1'057 (233.6) | 628 (138.8) | 417 (92.2) | 556 (122.9) | 1'213(268.1)  |
| H02AB                                                           | Systemic glucocorticoids                             | 850 (187.8)   | 451 (99.7)  | 284 (62.8) | 408 (90.2)  | 1'003 (221.7) |
| L04AD, AX,<br>AA, A07EC,<br>P01BA02,<br>L01XC02                 | Traditional immunosuppressants                       | 463 (102.3)   | 453 (100.1) | 429 (94.8) | 468 (103.4) | 591 (130.6)   |
| A07EC02                                                         | Mesalazine                                           | 66 (14.6)     | 65 (14.4)   | 67 (14.8)  | 75 (16.6)   | 106 (23.4)    |
| A07EC01                                                         | Sulfasalazine                                        | 23 (5.1)      | 22 (4.9)    | 18 (4.0)   | 16 (3.5)    | 24 (5.3)      |
| P01BA02                                                         | Hydroxychloroquine                                   | 44 (9.7)      | 42 (9.3)    | 38 (8.4)   | 41 (9.1)    | 52 (11.5)     |
| L04AX0                                                          | Azathioprine                                         | 47 (10.4)     | 42 (9.3)    | 43 (9.5)   | 39 (8.6)    | 50 (11)       |
| L04AD02                                                         | Tacrolimus                                           | *             | *           | *          | *           | *             |
| L04AD01                                                         | Ciclosporin                                          | *             | *           | *          | *           | *             |
| L04AX03                                                         | Methotrexate                                         | *             | *           | *          | *           | *             |
| L01BA01                                                         | Methotrexate                                         | *             | *           | *          | *           | *             |
| L04AA06                                                         | Myophenolic acid                                     | *             | *           | *          | *           | *             |
| L04AA29                                                         | Baricitinib                                          | *             | *           | *          | *           | *             |

|                                                                  |                                                                 |           |           |           |           |           |
|------------------------------------------------------------------|-----------------------------------------------------------------|-----------|-----------|-----------|-----------|-----------|
| L04AB, AC                                                        | Biologic DMARDS                                                 | 92 (20.3) | 81 (17.9) | 53 (11.7) | 37 (8.2)  | 86 (19.0) |
| L04AB                                                            | TNF alpha inhibitors                                            | 85 (18.8) | 78 (17.2) | 52 (11.5) | 37 (8.2)  | 83 (18.3) |
| L04AB05                                                          | <i>Certolizumab</i>                                             | 18 (4.0)  | 20 (4.4)  | 19 (4.2)  | 18 (4.0)  | 28 (6.2)  |
| L04AB02                                                          | <i>Infliximab</i>                                               | 24 (5.3)  | 22 (4.9)  | 19 (4.2)  | 11 (2.4)  | 22 (4.9)  |
| L04AB01                                                          | <i>Etanercept</i>                                               | 20 (4.4)  | 17 (3.8)  | 7 (1.5)   | 3 (0.7)   | 19 (4.2)  |
| L04AB04                                                          | <i>Adalimumab</i>                                               | 17 (3.8)  | 15 (3.3)  | *         | *         | 17 (3.8)  |
| L04AB06                                                          | <i>Golimumab</i>                                                | *         | *         | *         | *         | *         |
| L04AC                                                            | Interleukin inhibitors                                          | *         | *         | *         | *         | *         |
| L04AC07                                                          | <i>Tocilizumab</i>                                              | *         | *         | *         | *         | *         |
| L04AC05                                                          | <i>Ustekinumab</i>                                              | *         | *         | *         | *         | *         |
| L04AA33                                                          | <i>Vedolizumab</i>                                              | *         | *         | *         | *         | *         |
| L01XC                                                            | Monoclonal antibodies                                           | *         | *         | *         | *         | *         |
| L01XC02                                                          | <i>Rituximab</i>                                                | *         | *         | *         | *         | *         |
| L01XC03                                                          | <i>Trastuzumab</i>                                              | *         | *         | *         | *         | *         |
| L01XC07                                                          | <i>Bevacizumab</i>                                              | *         | *         | *         | *         | *         |
| J06BA                                                            | Immunoglobulins, normal human                                   | *         | *         | *         | 11 (2.4)  | 13 (2.9)  |
| J06BA02                                                          | <i>Immunoglobulins, normal for intravascular administration</i> | *         | *         | *         | 11 (2.4)  | 13 (2.9)  |
|                                                                  | Multiple sclerosis specific drugs                               | 63 (13.9) | 38 (8.4)  | 5 (1.1)   | 8 (1.8)   | 35 (7.7)  |
| L04AA23                                                          | <i>Natalizumab</i>                                              | 21 (4.6)  | 14 (3.1)  | *         | *         | 14 (3.1)  |
| L03AX13                                                          | <i>Glatiramer acetate</i>                                       | 22 (4.9)  | 12 (2.7)  | *         | *         | 13 (2.9)  |
| L03AB07                                                          | <i>Interferon beta-1 a</i>                                      | 20 (4.4)  | 11(2.4)   | *         | *         | 12 (2.7)  |
| L04AX07                                                          | <i>Dimethylfumarate</i>                                         | *         | *         | *         | *         | *         |
| L04AA27                                                          | <i>Fingolimod</i>                                               | *         | *         | *         | *         | *         |
| J05AR +<br>J05AE01 / 03<br>/ 08 / 10 +<br>J05AF05 / 07<br>/ 11 + | HIV antiretrovirals                                             | 60 (13.3) | 62 (13.7) | 79 (17.5) | 87 (19.2) | 98 (21.7) |

| J05AG01 /<br>04 / 05 + |                                                   |          |          |          |          |          |
|------------------------|---------------------------------------------------|----------|----------|----------|----------|----------|
| J05AR03                | <i>Tenofovir disoproxil and<br/>emtricitabine</i> | 28 (6.2) | 26 (5.7) | 32 (7.1) | 36 (8.0) | 40 (8.8) |
| J05AE03                | <i>Ritonavir</i>                                  | 16 (3.5) | 15 (3.3) | 25 (5.5) | 27 (0.2) | 29 6.4)  |

\* Indicates numbers below 10 and are not shown due to confidentiality reasons.



**Table S3.** Exposure to known or potential teratogens drugs during risk period and associated potential risks (weighted numbers).

| Known or potential teratogenic drugs (ATC code) | Warnings regarding use during critical period                                                                                                    | Risk period                       | Pregnancies exposed during risk period during study period (N) | Pregnancies exposed during risk period during study period (/10'000) |
|-------------------------------------------------|--------------------------------------------------------------------------------------------------------------------------------------------------|-----------------------------------|----------------------------------------------------------------|----------------------------------------------------------------------|
| Methotrexate (L01BA01, L04AX03)                 | Risk of abortion. Malformations including face, skull, central nervous system, limbs, heart.                                                     | T1 (maximal risk between 8-10 GW) | *                                                              | *                                                                    |
| Mycophenolic acid (L04AA06)                     | Risk of abortion. Malformations including cleft palate, ear deformities in up to 25% of exposed fetuses.                                         | T1                                | *                                                              | *                                                                    |
| Cyclophosphamide (L01AA01)                      | Malformations including the face, skull, eyes and central nervous system. Hematologic anomalies (anemia, leucopenia) in the newborn.             | T1,T2 and T3                      | ***                                                            | ***                                                                  |
| Carbimazole (H03BB01)                           | Malformations including aplasia cutis, choanal atresia, tracheo-esophageal fistula in up to 4% of exposed fetuses.                               | T1 (maximal risk between 6-10 GW) | 22                                                             | 4.9                                                                  |
| Lithium (N05AN01)                               | Increased risk of heart malformation, especially the Ebstein malformation in 2.5% of exposed babies (including 1% of Ebstein disease vs 0.005%). | T1 (until GW 10)                  | *                                                              | *                                                                    |
| Dolutegravir (J05AR13)                          | Suspicion of an increased risk of neural tube defects.                                                                                           | T1 (Maximal risk between 0-4 GW)  | *                                                              | *                                                                    |

\* Indicates numbers below 10 and are not shown due to confidentiality reasons.

**Table S4.** Exposure to known fetotoxic drugs during risk period and associated potential risks (weighted numbers).

| Known or potential fetotoxic drugs (ATC code)                                                                                                    | Warnings regarding use during critical period                                                                                                                                                                                                                                                                                                                                                                                     | Risk period | Pregnancies exposed during risk period during study period (N) | Pregnancies exposed during risk period during study period /10'000 95%CI) |
|--------------------------------------------------------------------------------------------------------------------------------------------------|-----------------------------------------------------------------------------------------------------------------------------------------------------------------------------------------------------------------------------------------------------------------------------------------------------------------------------------------------------------------------------------------------------------------------------------|-------------|----------------------------------------------------------------|---------------------------------------------------------------------------|
| Agents acting on the RAA system. (C09)                                                                                                           | Renal toxicity which can induce oligo/anamnios, with potential pulmonary, skull hypoplasia and reduction of the extremities. Neonatal renal insufficiency.                                                                                                                                                                                                                                                                        | T2 and T3   | 12, *                                                          | 2.7, *                                                                    |
| Psychotropic drugs<br>- Antidepressants ;<br>- Antipsychotics ;<br>- Benzodiazepines and related drugs ((N06A, N05A, N05AN, N05BA, N05CD, N05CF) | -1/3 newborns present transient neonatal symptoms (serotonergic toxicity or weaning symptoms) ;<br>- Risk of transient extra-pyramidal symptoms in the newborn ;<br>- Prenatal exposure to benzodiazepines with long half-life in may cause impregnation symptoms (sleepiness, suction problems, hypotension, respiratory distress), whereas short half-life substances may cause weaning symptoms (agitation, hyperexcitability) | T3          | 771                                                            | 170.4                                                                     |
| Trastuzumab (L01XC03)                                                                                                                            | Oligo-anhydramnios                                                                                                                                                                                                                                                                                                                                                                                                                | T2 and T3   | 0, 0                                                           | 0.0                                                                       |
| Rituximab (L01XC02)                                                                                                                              | Neonatal B cell depletion                                                                                                                                                                                                                                                                                                                                                                                                         | T2 and T3   | 0, 0                                                           | 0.0                                                                       |

\* Indicates numbers below 10 and are not shown due to confidentiality reasons.

**Table S5.** Exposure to potential teratogenic drugs (risk found in animal studies but not in human data) during risk period and associated potential risks (weighted numbers).

| Potential teratogenic drugs (ATC code) | Warnings regarding use during critical period                          | Risk period           | Pregnancies exposed during risk period during study period (N) | Pregnancies exposed during risk period during study period (% 95%CI) |
|----------------------------------------|------------------------------------------------------------------------|-----------------------|----------------------------------------------------------------|----------------------------------------------------------------------|
| Propylthiouracil (H03BA02)             |                                                                        | T1                    | 33                                                             | 7.3                                                                  |
| Mitoxantrone (L01DB07)                 | Contraception is recommended 4 months after the last administration    | Pre-pregnancy and T1. | 0, 0                                                           | 0.0, 0.0                                                             |
| Fingolimod (L04AA27)                   | Contraception is recommended 2 months after the last administration    |                       | *, *                                                           | *, *                                                                 |
| Teriflunomide (L04AA31)                |                                                                        |                       | 0, 0                                                           | 0.0, 0.0                                                             |
| Leflunomide (L04AA13)                  |                                                                        |                       | 0, 0                                                           | 0.0, 0.0                                                             |
| Dimethylfumarate (L04AX07)             | Contraception is recommended 3.5 months after the last administration. |                       | *, *                                                           | *, *                                                                 |
| Cladribine (L01BB04, L04AA40)          |                                                                        |                       | 0, 0                                                           | 0.0                                                                  |
| Alemtuzumab (L04AA34)                  | Contraception is recommended 4 months after the last administration.   |                       | 0, 0                                                           | 0.0                                                                  |
| Tofacitinib (L04AA29) [90]             |                                                                        |                       | *, *                                                           | *, *                                                                 |
| Baricitinib (L04AA37) [91]             |                                                                        |                       | 0, 0                                                           | 0.0                                                                  |

\* Indicates numbers below 10 and are not shown due to confidentiality reasons.
